# Supplementary material
Source: Frontiers journal article supplement (https://www.frontiersin.org/articles/444388)
Supplement: Table_8.xls [file Table_8.xls]

## Sheet: S8
Additional Table S8: Detailed molecular information of significant MTAs for 23 agro-morphological traits
s.no	Traits	SNP marker	Chr	Position (cM)	Physical position (Mb)	Description(BLASTx)	IWGSC Gene ID	Neighbouring Gene ID	Tissue/ FPKM	#GO	GO IDs	GO Names	Enzyme Codes	Enzyme Names	InterPro IDs	InterPro GO IDs	InterPro GO Names
1	C_Col	AX-94962809	2A	11.09	NA	---	---	---	NF	---	---	---	---	---	---	---	---
2	C_Col	AX-94799212	4B	111.19	7.83455	Aminopeptidase M1	TraesCS4D02G017700	TraesCS4D02G017800, TraesCS4D02G017900, TraesCS4D02G018000	grain_z71-39.60,spike_z65-41.97	7	C:GO:0005783; P:GO:0006508; F:GO:0008270; C:GO:0031090; F:GO:0042277; P:GO:0043171; F:GO:0070006	C:endoplasmic reticulum; P:proteolysis; F:zinc ion binding; C:organelle membrane; F:peptide binding; P:peptide catabolic process; F:metalloaminopeptidase activity	EC:3.4.11	Acting on peptide bonds (peptidases)	G3DSA:1.25.50.20 (GENE3D); IPR001930 (PANTHER); PTHR11533:SF183 (PANTHER)	P:GO:0006508	P:proteolysis
3	C_Col	AX-94673458	5B	52.43	NA	---	---	---	NF	---	---	---	---	---	---	---	---
4	C_Col	AX-95165934	6A	217.8	464.714	serine/threonine-protein phosphatase PP1-like	TraesCS6D02G388000	TraesCS6D02G388100, TraesCS6D02G388200, TraesCS6D02G388200, TraesCS6D02G388300	<5	5	F:GO:0004722; C:GO:0005634; C:GO:0005737; P:GO:0006470; F:GO:0046872	F:protein serine/threonine phosphatase activity; C:nucleus; C:cytoplasm; P:protein dephosphorylation; F:metal ion binding	EC:3.1.3.16	Protein-serine/threonine phosphatase	IPR006186 (PRINTS); IPR006186 (SMART); IPR029052 (G3DSA:3.60.21.GENE3D); IPR004843 (PFAM); PTHR11668:SF294 (PANTHER); PTHR11668 (PANTHER); SSF56300 (SUPERFAMILY)	F:GO:0016787	F:hydrolase activity
5	C_Col	AX-95203033	6B	59.6	506.727	uncharacterized protein LOC109769254	TraesCS6B02G280700	TraesCS6B02G280600, TraesCS6B02G280500	grain_z85-34.93, spike_z65-23.52	---	---	---	---	---	no IPS match	no IPS match	no IPS match
6	C_Col	AX-94461579	6B	62.83	513.692	aldehyde dehydrogenase family 3 member F1-like	TraesCS6B02G284900	---	spike_z65-10.73	3	F:GO:0004028; P:GO:0006081; P:GO:0055114	F:3-chloroallyl aldehyde dehydrogenase activity; P:cellular aldehyde metabolic process; P:oxidation-reduction process	---	---	IPR015590 (PFAM); IPR016163 (G3DSA:3.40.309.GENE3D); PTHR43570:SF17 (PANTHER); PTHR43570 (PANTHER); IPR016161 (SUPERFAMILY)	F:GO:0016491; F:GO:0016620; P:GO:0055114	F:oxidoreductase activity; F:oxidoreductase activity, acting on the aldehyde or oxo group of donors, NAD or NADP as acceptor; P:oxidation-reduction process
7	C_Col	AX-94416850	6B	67.99	659.234	probable alpha,alpha-trehalose-phosphate synthase [UDP-forming] 11	TraesCS6B02G384500	---	grain_z71-17.35, spike_z65-5	7	F:GO:0003825; F:GO:0004805; C:GO:0005739; C:GO:0005829; P:GO:0005992; P:GO:0016311; P:GO:0070413	F:alpha,alpha-trehalose-phosphate synthase (UDP-forming) activity; F:trehalose-phosphatase activity; C:mitochondrion; C:cytosol; P:trehalose biosynthetic process; P:dephosphorylation; P:trehalose metabolism in response to stress	EC:2.4.1.15; EC:3.1.3.12	Alpha,alpha-trehalose-phosphate synthase (UDP-forming); Trehalose-phosphatase	IPR023214 (G3DSA:3.40.50.GENE3D); IPR003337 (PFAM); PTHR10788 (PANTHER); PTHR10788:SF46 (PANTHER); IPR036412 (SUPERFAMILY)	F:GO:0003824; P:GO:0005992	F:catalytic activity; P:trehalose biosynthetic process
8	C_Col	AX-94674712	6B	62.83	501.108	vesicle-associated protein 1-3	TraesCS6B02G277000	TraesCS6B02G276900, TraesCS6B02G277100	<5	2	C:GO:0043231; C:GO:0044425	C:intracellular membrane-bounded organelle; C:membrane part	---	---	IPR013783 (G3DSA:2.60.40.GENE3D); PTHR10809:SF51 (PANTHER); IPR016763 (PANTHER); IPR008962 (SUPERFAMILY)	C:GO:0005789	C:endoplasmic reticulum membrane
9	C_Col	AX-94774307	6B	62.83	NA	---	---	---	NF	---	---	---	---	---	---	---	---
10	C_Col	AX-94937357	6B	62.83	454.65	serine/threonine-protein kinase D6PKL1-like, transcription initiation factor TFIID subunit 4b-like isoform X1	TraesCS6A02G242800, TraesCS6A02G242900	TraesCS6A02G243000, TraesCS6A02G243100	grain_z85-14.46, spike_z32-8.12	6	F:GO:0004674; F:GO:0005524; C:GO:0005634; C:GO:0005737; C:GO:0005886; P:GO:0006468	F:protein serine/threonine kinase activity; F:ATP binding; C:nucleus; C:cytoplasm; C:plasma membrane; P:protein phosphorylation	EC:2.7.11	Transferring phosphorus-containing groups	G3DSA:1.10.510.10 (GENE3D); PTHR24351 (PANTHER); PTHR24351:SF164 (PANTHER); IPR000719 (PROSITE_PROFILES); IPR011009 (SUPERFAMILY)	F:GO:0004672; F:GO:0005524; P:GO:0006468	F:protein kinase activity; F:ATP binding; P:protein phosphorylation
11	C_Col	AX-94933582	6B	62.83	457.074	putative F-box protein At3g10240 isoform X1	TraesCS6A02G245700	TraesCS6A02G245800, TraesCS6A02G245900	<5	---	---	---	---	---	PTHR35546 (PANTHER); PTHR35546:SF1 (PANTHER)	no GO terms	no GO terms
12	C_Col	AX-94710605	6B	62.83	506.269	Putative kinase-like protein TMKL1	TraesCS6B02G280100	---	grain_z71-60.67, spike_z39-55.64	4	F:GO:0004672; F:GO:0005524; P:GO:0006468; C:GO:0016021	F:protein kinase activity; F:ATP binding; P:protein phosphorylation; C:integral component of membrane	---	---	PIRSF000654 (PIRSF); IPR000719 (PFAM); G3DSA:1.10.510.10 (GENE3D); PTHR27008:SF21 (PANTHER); PTHR27008 (PANTHER); IPR000719 (PROSITE_PROFILES); IPR011009 (SUPERFAMILY)	F:GO:0004672; F:GO:0005524; P:GO:0006468	F:protein kinase activity; F:ATP binding; P:protein phosphorylation
13	C_Col	AX-94542881	6B	62.83	514.678	kinesin-related protein1	TraesCS6B02G285500	---	grain_z85-13.64, spike_z32-9.86	7	F:GO:0003777; F:GO:0005524; C:GO:0005871; C:GO:0005874; P:GO:0007018; F:GO:0008017; F:GO:0016887	F:microtubule motor activity; F:ATP binding; C:kinesin complex; C:microtubule; P:microtubule-based movement; F:microtubule binding; F:ATPase activity	EC:3.6.1.3; EC:3.6.1.15	Adenosinetriphosphatase; Nucleoside-triphosphate phosphatase	IPR021881 (PFAM); mobidb-lite (MOBIDB_LITE); IPR027640 (PANTHER); PTHR24115:SF555 (PANTHER)	F:GO:0003777; P:GO:0007018	F:microtubule motor activity; P:microtubule-based movement
14	C_Col	AX-94654857	6B	62.83	505.801	purine-uracil permease NCS1	TraesCS6B02G279600	TraesCS6B02G279700	<5	7	C:GO:0005886; C:GO:0009526; F:GO:0015205; P:GO:0015851; C:GO:0016021; P:GO:0043100; P:GO:0055085	C:plasma membrane; C:plastid envelope; F:nucleobase transmembrane transporter activity; P:nucleobase transport; C:integral component of membrane; P:pyrimidine nucleobase salvage; P:transmembrane transport	---	---	no IPS match	no IPS match	no IPS match
15	C_Col	AX-94553397	6B	62.83	487.681	FT-interacting protein 1	TraesCS1B02G279300	---	grain_z71-23.82, spike_z32-49.13	2	C:GO:0016021; F:GO:0016757	C:integral component of membrane; F:transferase activity, transferring glycosyl groups	---	---	IPR000008 (SMART); IPR013583 (PFAM); IPR035892 (G3DSA:2.60.40.GENE3D); IPR000008 (PFAM); IPR035892 (G3DSA:2.60.40.GENE3D); mobidb-lite (MOBIDB_LITE); PTHR31425 (PANTHER); PTHR31425:SF4 (PANTHER); IPR000008 (PROSITE_PROFILES); IPR000008 (PROSITE_PROFILES); cd04019 (CDD); cd08379 (CDD); SSF49562 (SUPERFAMILY); SSF49562 (SUPERFAMILY)	no GO terms	no GO terms
16	C_Col	AX-94988670	6B	62.83	508.607	ribosomal protein L19	TraesCS6B02G282200	TraesCS6B02G282300	grain_z71-19.15, spike_z65-12.35	4	F:GO:0003735; C:GO:0005789; C:GO:0005840; P:GO:0006412	F:structural constituent of ribosome; C:endoplasmic reticulum membrane; C:ribosome; P:translation	---	---	no IPS match	no IPS match	no IPS match
17	C_Col	AX-95008333	6B	62.83	501.064	S-adenosylmethionine synthase 1	TraesCS6B02G276800	---	grain_z71-52.63, spike_z39-133.48	6	F:GO:0004478; F:GO:0005524; C:GO:0005829; P:GO:0006556; P:GO:0006730; F:GO:0046872	F:methionine adenosyltransferase activity; F:ATP binding; C:cytosol; P:S-adenosylmethionine biosynthetic process; P:one-carbon metabolic process; F:metal ion binding	EC:2.5.1.6	Methionine adenosyltransferase	IPR002133 (PIRSF); IPR002133 (TIGRFAM); G3DSA:3.30.300.10 (GENE3D); G3DSA:3.30.300.10 (GENE3D); G3DSA:3.30.300.10 (GENE3D); IPR022630 (PFAM); IPR022629 (PFAM); IPR022628 (PFAM); PTHR11964:SF16 (PANTHER); IPR002133 (PANTHER); IPR002133 (HAMAP); IPR022636 (SUPERFAMILY); IPR022636 (SUPERFAMILY); IPR022636 (SUPERFAMILY)	F:GO:0004478; F:GO:0005524; P:GO:0006556	F:methionine adenosyltransferase activity; F:ATP binding; P:S-adenosylmethionine biosynthetic process
18	C_Col	AX-94561610	6B	62.83	511.423	protein ORANGE, chloroplastic-like	TraesCS6B02G283200	---	grain_z85-9.53, spike_z65-7.28	5	C:GO:0005634; C:GO:0009507; C:GO:0016021; P:GO:0050821; P:GO:1904143	C:nucleus; C:chloroplast; C:integral component of membrane; P:protein stabilization; P:positive regulation of carotenoid biosynthetic process	---	---	mobidb-lite (MOBIDB_LITE)	no GO terms	no GO terms
19	C_Col	AX-94838464	6B	62.83	462.027	inositol phosphorylceramide glucuronosyltransferase 1	TraesCS6B02G257400	TraesCS6B02G257500	<5	6	C:GO:0005768; C:GO:0005802; F:GO:0015020; C:GO:0016021; P:GO:0046513; F:GO:1990482	C:endosome; C:trans-Golgi network; F:glucuronosyltransferase activity; C:integral component of membrane; P:ceramide biosynthetic process; F:sphingolipid alpha-glucuronosyltransferase activity	EC:2.4.1.17	Glucuronosyltransferase	no IPS match	no IPS match	no IPS match
20	C_Col	AX-95215114	6B	62.83	500.896	S-adenosylmethionine synthase 1	TraesCS6B02G276700	---	grain_z71-225.5, spike_z39-327.4	6	F:GO:0004478; F:GO:0005524; C:GO:0005829; P:GO:0006556; P:GO:0006730; F:GO:0046872	F:methionine adenosyltransferase activity; F:ATP binding; C:cytosol; P:S-adenosylmethionine biosynthetic process; P:one-carbon metabolic process; F:metal ion binding	EC:2.5.1.6	Methionine adenosyltransferase	IPR022630 (PFAM); G3DSA:3.30.300.10 (GENE3D); G3DSA:3.30.300.10 (GENE3D); IPR002133 (TIGRFAM); IPR022629 (PFAM); PTHR11964:SF16 (PANTHER); IPR002133 (PANTHER); IPR022636 (SUPERFAMILY); IPR022636 (SUPERFAMILY)	F:GO:0004478; F:GO:0005524; P:GO:0006556	F:methionine adenosyltransferase activity; F:ATP binding; P:S-adenosylmethionine biosynthetic process
21	C_Col	AX-94864228	6B	62.83	431.175	leucine-rich repeat (LRR) family protein	TraesCS6A02G228800	TraesCS6A02G228700, TraesCS6A02G228900	spike_z39-25.39	1	C:GO:0016020	C:membrane	---	---	IPR032675 (G3DSA:3.80.10.GENE3D); PTHR32093:SF90 (PANTHER); PTHR32093 (PANTHER); SSF52058 (SUPERFAMILY)	no GO terms	no GO terms
22	C_Col	AX-95086436	6B	62.83	500.21	probable trehalose-phosphate phosphatase 1	TraesCS6B02G276300	TraesCS6B02G276400, TraesCS6B02G276500	NF	5	F:GO:0004805; P:GO:0005992; P:GO:0009409; P:GO:0009651; P:GO:0016311	F:trehalose-phosphatase activity; P:trehalose biosynthetic process; P:response to cold; P:response to salt stress; P:dephosphorylation	EC:3.1.3.12	Trehalose-phosphatase	IPR023214 (G3DSA:3.40.50.GENE3D); IPR003337 (PFAM); mobidb-lite (MOBIDB_LITE); mobidb-lite (MOBIDB_LITE); PTHR43768 (PANTHER); PTHR43768:SF14 (PANTHER); IPR036412 (SUPERFAMILY)	F:GO:0003824; P:GO:0005992	F:catalytic activity; P:trehalose biosynthetic process
23	PGH	AX-94940584	1B	8.24	15.8746	BRCT domain-containing protein	TraesCS1B02G032600	TraesCS1B02G032700, TraesCS1B02G032800	<5	1	F:GO:0046872	F:metal ion binding	---	---	IPR013083 (G3DSA:3.30.40.GENE3D); IPR011011 (SUPERFAMILY)	no GO terms	no GO terms
24	PGH	AX-94716155	1B	38.86	518.812	storage protein activator	TraesCS1A02G329900	---	stem_z32-10.77	5	F:GO:0003700; C:GO:0005634; P:GO:0010581; F:GO:0043565; P:GO:0045893	F:DNA-binding transcription factor activity; C:nucleus; P:regulation of starch biosynthetic process; F:sequence-specific DNA binding; P:positive regulation of transcription, DNA-templated	---	---	no IPS match	no IPS match	no IPS match
25	PGH	AX-94873452	1B	38.86	419.735	MATH domain-containing protein At5g43560-like isoform X2	TraesCS1D02G327700	TraesCS1D02G327600, TraesCS1D02G327500	stem_z30-7.97	---	---	---	---	---	mobidb-lite (MOBIDB_LITE); mobidb-lite (MOBIDB_LITE); mobidb-lite (MOBIDB_LITE); PTHR45001 (PANTHER)	no GO terms	no GO terms
26	Aur_Col	AX-94464266	5A	70.36	706.24	Beta-amylase	TraesCS5A02G554200	TraesCS5A02G554100, TraesCS5A02G554000, TraesCS5A02G554300	NF	4	P:GO:0000272; F:GO:0016161; F:GO:0042802; F:GO:0102229	P:polysaccharide catabolic process; F:beta-amylase activity; F:identical protein binding; F:amylopectin maltohydrolase activity	EC:3.2.1.2	Beta-amylase	IPR001554 (PRINTS); IPR001554 (PFAM); G3DSA:3.20.20.80 (GENE3D); PTHR31352:SF5 (PANTHER); IPR001554 (PANTHER); IPR017853 (SUPERFAMILY)	P:GO:0000272; F:GO:0016161	P:polysaccharide catabolic process; F:beta-amylase activity
27	Aur_Col	AX-94472311	4B	22.53	653.447	putative disease resistance protein RGA3	TraesCS4B02G576600LC	TraesCS4B02G365300, TraesCS4B02G365400, TraesCS4B02G365500, TraesCS4B02G365600	NHF	1	C:GO:0016020	C:membrane	---	---	mobidb-lite (MOBIDB_LITE); mobidb-lite (MOBIDB_LITE); PTHR23155 (PANTHER); PTHR23155:SF861 (PANTHER)	no GO terms	no GO terms
28	Aur_Col	AX-94952968	1A	58.79	16.3009	predicted protein	TraesCS1A02G040100LC	---	NF	---	---	---	---	---	PTHR32133 (PANTHER); PTHR32133:SF243 (PANTHER)	no GO terms	no GO terms
29	Wax_LS	AX-95000081	6D	177.76	5.36542	putative disease resistance RPP13-like protein 3	TraesCS6D02G014600LC	---	<5	1	F:GO:0043531	F:ADP binding	---	---	IPR032675 (G3DSA:3.80.10.GENE3D); mobidb-lite (MOBIDB_LITE); mobidb-lite (MOBIDB_LITE); PTHR43889 (PANTHER); PTHR43889:SF33 (PANTHER); SSF52047 (SUPERFAMILY)	no GO terms	no GO terms
30	Wax_LS	AX-94527988	3A	115.9	617.074	cytochrome P450 86A1	TraesCS3A02G368200	TraesCS3A02G368100	NF	8	F:GO:0005506; C:GO:0005773; P:GO:0006631; P:GO:0010345; C:GO:0016021; F:GO:0018685; F:GO:0020037; P:GO:0055114	F:iron ion binding; C:vacuole; P:fatty acid metabolic process; P:suberin biosynthetic process; C:integral component of membrane; F:alkane 1-monooxygenase activity; F:heme binding; P:oxidation-reduction process	EC:1.14.15.3; EC:1.14.15	Alkane 1-monooxygenase; Acting on paired donors, with incorporation or reduction of molecular oxygen. The oxygen incorporated need not be derived from O(2)	IPR001128 (PRINTS); IPR002401 (PRINTS); IPR036396 (G3DSA:1.10.630.GENE3D); IPR001128 (PFAM); PTHR24296 (PANTHER); PTHR24296:SF26 (PANTHER); IPR036396 (SUPERFAMILY)	F:GO:0005506; F:GO:0016705; F:GO:0020037; P:GO:0055114	F:iron ion binding; F:oxidoreductase activity, acting on paired donors, with incorporation or reduction of molecular oxygen; F:heme binding; P:oxidation-reduction process
31	Wax_Ped	AX-94527988	3A	115.9	617.074	cytochrome P450 86A1	TraesCS3A02G368200	TraesCS3A02G368100	NF	8	F:GO:0005506; C:GO:0005773; P:GO:0006631; P:GO:0010345; C:GO:0016021; F:GO:0018685; F:GO:0020037; P:GO:0055114	F:iron ion binding; C:vacuole; P:fatty acid metabolic process; P:suberin biosynthetic process; C:integral component of membrane; F:alkane 1-monooxygenase activity; F:heme binding; P:oxidation-reduction process	EC:1.14.15.3; EC:1.14.15	Alkane 1-monooxygenase; Acting on paired donors, with incorporation or reduction of molecular oxygen. The oxygen incorporated need not be derived from O(2)	IPR001128 (PRINTS); IPR002401 (PRINTS); IPR036396 (G3DSA:1.10.630.GENE3D); IPR001128 (PFAM); PTHR24296 (PANTHER); PTHR24296:SF26 (PANTHER); IPR036396 (SUPERFAMILY)	F:GO:0005506; F:GO:0016705; F:GO:0020037; P:GO:0055114	F:iron ion binding; F:oxidoreductase activity, acting on paired donors, with incorporation or reduction of molecular oxygen; F:heme binding; P:oxidation-reduction process
32	Ear_S	AX-94670534	7B	146.84	234.906	retrotransposon protein, putative, unclassified	TraesCS7B02G168100	TraesCS7B02G168200	stem_z32-36.25	6	F:GO:0003676; F:GO:0004523; F:GO:0016429; P:GO:0030488; C:GO:0031515; P:GO:0090502	F:nucleic acid binding; F:RNA-DNA hybrid ribonuclease activity; F:tRNA (adenine-N1-)-methyltransferase activity; P:tRNA methylation; C:tRNA (m1A) methyltransferase complex; P:RNA phosphodiester bond hydrolysis, endonucleolytic	EC:3.1.30; EC:3.1.26; EC:3.1.26.4	Acting on ester bonds; Acting on ester bonds; Ribonuclease H	IPR002156 (PFAM); IPR036397 (G3DSA:3.30.420.GENE3D); PTHR33033 (PANTHER); PTHR33033:SF54 (PANTHER); cd06222 (CDD); IPR012337 (SUPERFAMILY)	F:GO:0003676; F:GO:0004523	F:nucleic acid binding; F:RNA-DNA hybrid ribonuclease activity
33	Awn_P	AX-95082131	1A	54.04	3.84713	Gamma-gliadin	TraesCS1A02G007300	---	NF	---	---	---	---	---	PR00209 (PRINTS); mobidb-lite (MOBIDB_LITE); mobidb-lite (MOBIDB_LITE); mobidb-lite (MOBIDB_LITE); mobidb-lite (MOBIDB_LITE); mobidb-lite (MOBIDB_LITE)	no GO terms	no GO terms
34	Awn_P	AX-94859613	1A	88.71	454.229	probable protein phosphatase 2C 71	TraesCS1D02G378200	TraesCS1D02G378300	grain_z85-6.21	3	F:GO:0004721; P:GO:0006470; F:GO:0046872	F:phosphoprotein phosphatase activity; P:protein dephosphorylation; F:metal ion binding	EC:3.1.3.16	Protein-serine/threonine phosphatase	mobidb-lite (MOBIDB_LITE); IPR039123 (PANTHER); PTHR12320:SF36 (PANTHER)	no GO terms	no GO terms
35	Awn_P	AX-94607341	1A	54.04	0.512662	predicted protein	TraesCS1D02G002200	TraesCS1D02G002100, TraesCS1D02G002000, TraesCS1D02G002300	spike_z32-15.7	2	C:GO:0016020; C:GO:0016021	C:membrane; C:integral component of membrane	---	---	PTHR33384:SF3 (PANTHER); PTHR33384 (PANTHER)	no GO terms	no GO terms
36	Awn_P	AX-94982852	1A	58.79	15.1424	predicted protein	TraesCS1B02G030700	TraesCS1B02G030600, TraesCS1B02G030800	spike_z65-20.85	1	C:GO:0016021	C:integral component of membrane	---	---	PTHR33065:SF15 (PANTHER); PTHR33065 (PANTHER)	no GO terms	no GO terms
37	Awn_P	AX-94566415	1A	74.11	NA	---	---	---	NF	---	---	---	---	---	---	---	---
38	Awn_P	AX-94580758	1B	51.55	626.595	non-specific lipid-transfer protein 2	TraesCS1B02G394400	TraesCS1B02G394300, TraesCS1B02G394500, TraesCS1B02G394600	NF	1	P:GO:0006869	P:lipid transport	---	---	IPR016140 (SMART); IPR016140 (PFAM); G3DSA:1.10.110.10 (GENE3D); PTHR33214:SF5 (PANTHER); IPR033872 (PANTHER); IPR033872 (CDD); IPR036312 (SUPERFAMILY)	P:GO:0006869	P:lipid transport
39	Awn_P	AX-95006323	1B	8.24	16.4646	MPI	TraesCS1B02G033900	TraesCS1B02G033700, TraesCS1B02G033800, TraesCS1B02G034100, TraesCS1B02G034200	spike_z32-48.81	4	F:GO:0004867; F:GO:0008233; P:GO:0009611; P:GO:0010951	F:serine-type endopeptidase inhibitor activity; F:peptidase activity; P:response to wounding; P:negative regulation of endopeptidase activity	---	---	IPR000864 (PRINTS); G3DSA:3.30.10.10 (GENE3D); IPR000864 (PFAM); mobidb-lite (MOBIDB_LITE); IPR000864 (PANTHER); PTHR33091:SF28 (PANTHER); IPR000864 (PRODOM); IPR036354 (SUPERFAMILY)	F:GO:0004867; P:GO:0009611	F:serine-type endopeptidase inhibitor activity; P:response to wounding
40	Awn_P	AX-94817261	1D	208.95	583.365	F-box domain containing protein, expressed	TraesCS1A02G431000	TraesCS1A02G430900, TraesCS1A02G430800	grain_z85-7.11	1	C:GO:0016021	C:integral component of membrane	---	---	IPR001810 (SMART); IPR001810 (PFAM); G3DSA:1.20.1280.50 (GENE3D); PTHR32133:SF93 (PANTHER); PTHR32133 (PANTHER); IPR001810 (PROSITE_PROFILES); IPR036047 (SUPERFAMILY)	F:GO:0005515	F:protein binding
41	Awn_P	AX-95137795	1D	236.5	493.684	alpha carbonic anhydrase 7	---	TraesCS1D02G451600, TraesCS1D02G451700, TraesCS1D02G451800	NF	2	F:GO:0004089; F:GO:0008270	F:carbonate dehydratase activity; F:zinc ion binding	EC:4.2.1.1	Carbonic anhydrase	IPR036398 (G3DSA:3.10.200.GENE3D); IPR001148 (PFAM); PTHR18952:SF143 (PANTHER); IPR023561 (PANTHER); IPR001148 (PROSITE_PROFILES); IPR036398 (SUPERFAMILY)	F:GO:0004089; F:GO:0008270	F:carbonate dehydratase activity; F:zinc ion binding
42	Awn_P	AX-94457975	2A	83.23	542.47	aspartic proteinase nepenthesin-1-like	TraesCS2A02G316500	TraesCS2A02G316400	NF	3	F:GO:0004190; P:GO:0006508; P:GO:0030163	F:aspartic-type endopeptidase activity; P:proteolysis; P:protein catabolic process	EC:3.4.23	Acting on peptide bonds (peptidases)	IPR032861 (PFAM); IPR032799 (PFAM); IPR021109 (G3DSA:2.40.70.GENE3D); IPR021109 (G3DSA:2.40.70.GENE3D); PTHR13683:SF522 (PANTHER); IPR001461 (PANTHER); IPR033121 (PROSITE_PROFILES); IPR034161 (CDD); IPR021109 (SUPERFAMILY)	F:GO:0004190; P:GO:0006508	F:aspartic-type endopeptidase activity; P:proteolysis
43	Awn_P	AX-94708947	2A	1.59	8.18164	hypothetical protein TRIUR3_32132	TraesCS2A02G017600	TraesCS2A02G017300, TraesCS2A02G017400, TraesCS2A02G017500	NHF	---	---	---	---	---	IPR011676 (PFAM); PTHR33086 (PANTHER); PTHR33086:SF13 (PANTHER)	no GO terms	no GO terms
44	Awn_P	AX-95128830	2A	1.59	18.6451	70 kDa peptidyl-prolyl isomerase	TraesCS2D02G050300	TraesCS2D02G050200, TraesCS2D02G050400	spike_z65-38.97, grain_z71-45.37	5	P:GO:0000413; F:GO:0003755; C:GO:0005737; C:GO:0016020; P:GO:0061077	P:protein peptidyl-prolyl isomerization; F:peptidyl-prolyl cis-trans isomerase activity; C:cytoplasm; C:membrane; P:chaperone-mediated protein folding	EC:5.2.1.8	Peptidylprolyl isomerase	G3DSA:3.10.50.40 (GENE3D); IPR001179 (PFAM); IPR023566 (PANTHER); IPR001179 (PROSITE_PROFILES); SSF54534 (SUPERFAMILY)	no GO terms	no GO terms
45	Awn_P	AX-95112947	2B	27.22	28.8839	Wall-associated receptor kinase 3	TraesCS2B02G059400	TraesCS2B02G059300, TraesCS2B02G059500, TraesCS2B02G059700	<5	7	F:GO:0004674; F:GO:0005509; F:GO:0005524; C:GO:0005886; P:GO:0006468; C:GO:0016021; F:GO:0030247	F:protein serine/threonine kinase activity; F:calcium ion binding; F:ATP binding; C:plasma membrane; P:protein phosphorylation; C:integral component of membrane; F:polysaccharide binding	EC:2.7.11	Transferring phosphorus-containing groups	IPR000742 (SMART); IPR001881 (SMART); IPR025287 (PFAM); G3DSA:2.10.25.10 (GENE3D); PTHR33491 (PANTHER); PTHR33491:SF10 (PANTHER); IPR000742 (PROSITE_PROFILES); IPR000742 (PROSITE_PROFILES); cd00054 (CDD); SSF57196 (SUPERFAMILY)	F:GO:0005509; F:GO:0030247	F:calcium ion binding; F:polysaccharide binding
46	Awn_P	AX-94687213	2B	53.31	NA	---	---	---	NF	---	---	---	---	---	---	---	---
47	Awn_P	AX-94629483	2B	187.28	635.95	putative magnesium transporter NIPA4	---	TraesCS2D02G567600	<5	5	C:GO:0005769; C:GO:0005886; F:GO:0015095; C:GO:0016021; P:GO:1903830	C:early endosome; C:plasma membrane; F:magnesium ion transmembrane transporter activity; C:integral component of membrane; P:magnesium ion transmembrane transport	---	---	no IPS match	no IPS match	no IPS match
48	Awn_P	AX-94697767	3A	209.17	724.493	protein DETOXIFICATION 40-like	TraesCS3A02G499300	TraesCS3A02G499200, TraesCS3A02G499400, TraesCS3A02G499500, TraesCS3A02G499600	<5	4	P:GO:0006855; F:GO:0015238; F:GO:0015297; C:GO:0016021	P:drug transmembrane transport; F:drug transmembrane transporter activity; F:antiporter activity; C:integral component of membrane	---	---	IPR002528 (PFAM); PTHR11206 (PANTHER); PTHR11206:SF191 (PANTHER)	P:GO:0006855; F:GO:0015238; F:GO:0015297; C:GO:0016020; P:GO:0055085	P:drug transmembrane transport; F:drug transmembrane transporter activity; F:antiporter activity; C:membrane; P:transmembrane transport
49	Awn_P	AX-95633803	3B	0.79	4.48706	probable sucrose-phosphate synthase 4	TraesCS3D02G013000	TraesCS3D02G012800, TraesCS3D02G012900, TraesCS3D02G013100	NF	3	P:GO:0005986; F:GO:0016157; F:GO:0046524	P:sucrose biosynthetic process; F:sucrose synthase activity; F:sucrose-phosphate synthase activity	EC:2.4.1.14; EC:2.4.1.13	Sucrose-phosphate synthase; Sucrose synthase	no IPS match	no IPS match	no IPS match
50	Awn_P	AX-94455345	4A	72.97	117.89	protein MODIFIER OF SNC1 11	---	TraesCS4A02G104400, TraesCS4A02G104500, TraesCS4A02G104600	NF	2	C:GO:0005634; P:GO:0016973	C:nucleus; P:poly(A)+ mRNA export from nucleus	---	---	mobidb-lite (MOBIDB_LITE); mobidb-lite (MOBIDB_LITE); mobidb-lite (MOBIDB_LITE); mobidb-lite (MOBIDB_LITE)	no GO terms	no GO terms
51	Awn_P	AX-95156879	4A	97.19	3.8611	Geraniol 8-hydroxylase	TraesCS4B02G005900	TraesCS4B02G005500, TraesCS4B02G005600, TraesCS4B02G005700, TraesCS4B02G005800, TraesCS4B02G006000, TraesCS4B02G006100, TraesCS4B02G006200	spike_z65-14.86	5	F:GO:0005506; C:GO:0016021; F:GO:0016709; F:GO:0020037; P:GO:0055114	F:iron ion binding; C:integral component of membrane; F:oxidoreductase activity, acting on paired donors, with incorporation or reduction of molecular oxygen, NAD(P)H as one donor, and incorporation of one atom of oxygen; F:heme binding; P:oxidation-reduction process	EC:1.14.13	Acting on paired donors, with incorporation or reduction of molecular oxygen. The oxygen incorporated need not be derived from O(2)	IPR001128 (PRINTS); IPR002401 (PRINTS); IPR001128 (PFAM); IPR036396 (G3DSA:1.10.630.GENE3D); PTHR24298 (PANTHER); PTHR24298:SF320 (PANTHER); IPR036396 (SUPERFAMILY)	F:GO:0005506; F:GO:0016705; F:GO:0020037; P:GO:0055114	F:iron ion binding; F:oxidoreductase activity, acting on paired donors, with incorporation or reduction of molecular oxygen; F:heme binding; P:oxidation-reduction process
52	Awn_P	AX-95629916	4B	86.54	526.929	Adenylyl-sulfate kinase	TraesCS4B02G259500	TraesCS4B02G259600, TraesCS4B02G259700, TraesCS4B02G259800, TraesCS4B02G259900	spike_z39-12.91	5	P:GO:0000103; F:GO:0004020; F:GO:0005524; P:GO:0016310; P:GO:0070814	P:sulfate assimilation; F:adenylylsulfate kinase activity; F:ATP binding; P:phosphorylation; P:hydrogen sulfide biosynthetic process	EC:2.7.1.25	Adenylyl-sulfate kinase	no IPS match	no IPS match	no IPS match
53	Awn_P	AX-94581733	5A	72.22	679.734	replication protein A 70 kDa DNA-binding subunit D isoform X1	TraesCS2B02G481300	TraesCS2B02G481200	NF	1	F:GO:0004386	F:helicase activity	---	---	no IPS match	no IPS match	no IPS match
54	Awn_P	AX-94519690	5A	59.99	690.96	uncharacterized membrane protein At3g27390-like	TraesCS5A02G533800	TraesCS5A02G533600, TraesCS5A02G533700	<5	---	---	---	---	---	no IPS match	no IPS match	no IPS match
55	Awn_P	AX-95632082	5B	198.04	603.882	predicted protein	TraesCS5B02G427700	TraesCS5B02G427800	spike_z32-13.98	5	P:GO:0002098; C:GO:0005635; C:GO:0005829; C:GO:0005886; P:GO:0017183	P:tRNA wobble uridine modification; C:nuclear envelope; C:cytosol; C:plasma membrane; P:peptidyl-diphthamide biosynthetic process from peptidyl-histidine	---	---	mobidb-lite (MOBIDB_LITE); mobidb-lite (MOBIDB_LITE); PTHR21454 (PANTHER); PTHR21454:SF17 (PANTHER)	no GO terms	no GO terms
56	Awn_P	AX-94480365	5B	232.96	663.113	Putative disease resistance protein RGA3	TraesCS5B02G495800	TraesCS5B02G495900	stem_z30-5.38	1	F:GO:0043531	F:ADP binding	---	---	PR00364 (PRINTS); G3DSA:3.40.50.300 (GENE3D); IPR002182 (PFAM); IPR041118 (PFAM); mobidb-lite (MOBIDB_LITE); mobidb-lite (MOBIDB_LITE); PTHR44634 (PANTHER); PTHR44634:SF3 (PANTHER); cd00009 (CDD); IPR027417 (SUPERFAMILY)	F:GO:0043531	F:ADP binding
57	Awn_P	AX-94923750	5B	160.16	448.933	receptor-like protein kinase 5	TraesCS5D02G468500LC	---	spike_z39-7.57	2	C:GO:0016020; F:GO:0016740	C:membrane; F:transferase activity	---	---	G3DSA:1.10.510.10 (GENE3D); IPR000719 (PFAM); PTHR27000 (PANTHER); PTHR27000 (PANTHER); PTHR27000:SF282 (PANTHER); PTHR27000:SF282 (PANTHER); IPR000719 (PROSITE_PROFILES); IPR011009 (SUPERFAMILY)	F:GO:0004672; F:GO:0005524; P:GO:0006468	F:protein kinase activity; F:ATP binding; P:protein phosphorylation
58	Awn_P	AX-94504637	5B	160.16	548.435	receptor-like protein kinase 5	TraesCS5B02G559900LC	---	spike_z32-38.03	2	C:GO:0016020; F:GO:0016301	C:membrane; F:kinase activity	---	---	mobidb-lite (MOBIDB_LITE); mobidb-lite (MOBIDB_LITE)	no GO terms	no GO terms
59	Awn_P	AX-95120610	6B	130.12	461.977	O-acyltransferase WSD1	---	TraesCS6D02G381600, TraesCS6D02G381700	<5	3	F:GO:0004144; C:GO:0016021; P:GO:0045017	F:diacylglycerol O-acyltransferase activity; C:integral component of membrane; P:glycerolipid biosynthetic process	EC:2.3.1.20	Diacylglycerol O-acyltransferase	no IPS match	no IPS match	no IPS match
60	Awn_P	AX-94512879	6B	62.83	NA	---	---	---	NF	---	---	---	---	---	---	---	---
61	Awn_P	AX-94413428	6D	17.65	464.721	Uncharacterised protein	TraesCS6D02G388100	TraesCS6D02G388000, TraesCS6D02G388200, TraesCS6D02G388300, TraesCS6D02G388400, TraesCS6D02G388500, TraesCS6D02G388600	NF	1	P:GO:0000184	P:nuclear-transcribed mRNA catabolic process, nonsense-mediated decay	---	---	IPR019354 (PFAM); mobidb-lite (MOBIDB_LITE); mobidb-lite (MOBIDB_LITE); mobidb-lite (MOBIDB_LITE); mobidb-lite (MOBIDB_LITE); mobidb-lite (MOBIDB_LITE); mobidb-lite (MOBIDB_LITE); mobidb-lite (MOBIDB_LITE); IPR028802 (PANTHER)	P:GO:0000184	P:nuclear-transcribed mRNA catabolic process, nonsense-mediated decay
62	Awn_P	AX-95019756	7A	29.9	498.147	tRNA A64-2'-O-ribosylphosphate transferase isoform X1	TraesCS7B02G271300	TraesCS7B02G271400	<5	2	P:GO:0019988; F:GO:0043399	P:charged-tRNA amino acid modification; F:tRNA A64-2'-O-ribosylphosphate transferase activity	---	---	IPR033449 (PFAM); IPR007306 (PANTHER)	P:GO:0019988; F:GO:0043399	P:charged-tRNA amino acid modification; F:tRNA A64-2'-O-ribosylphosphate transferase activity
63	Awn_P	AX-94465215	7A	29.9	NA	---	---	---	NF	---	---	---	---	---	---	---	---
64	Awn_P	AX-95109168	7B	1.72	453.235	---NA---	---	TraesCS4B02G213900, TraesCS4B02G214000	NF	---	---	---	---	---	no IPS match	no IPS match	no IPS match
65	Awn_P	AX-94888246	7B	147.48	338.505	Valine--tRNA ligase mitochondrial 1	---	---	NF	3	F:GO:0004812; C:GO:0005737; P:GO:0006418	F:aminoacyl-tRNA ligase activity; C:cytoplasm; P:tRNA aminoacylation for protein translation	---	---	IPR002300 (PFAM); IPR009008 (G3DSA:3.90.740.GENE3D); PTHR11946 (PANTHER); PTHR11946:SF94 (PANTHER); IPR009008 (SUPERFAMILY)	F:GO:0000166; F:GO:0002161; F:GO:0004812; F:GO:0005524; P:GO:0006418	F:nucleotide binding; F:aminoacyl-tRNA editing activity; F:aminoacyl-tRNA ligase activity; F:ATP binding; P:tRNA aminoacylation for protein translation
66	Awn_P	AX-94759517	7B	24.53	718.359	mediator of RNA polymerase II transcription subunit 15a	TraesCS7B02G460900	TraesCS7B02G460800, TraesCS7B02G461000	spike_z65-14.92	3	F:GO:0003712; P:GO:0006355; F:GO:0031490	F:transcription coregulator activity; P:regulation of transcription, DNA-templated; F:chromatin DNA binding	---	---	mobidb-lite (MOBIDB_LITE); mobidb-lite (MOBIDB_LITE); mobidb-lite (MOBIDB_LITE); mobidb-lite (MOBIDB_LITE); mobidb-lite (MOBIDB_LITE); mobidb-lite (MOBIDB_LITE); PTHR33137 (PANTHER); PTHR33137:SF4 (PANTHER)	no GO terms	no GO terms
67	Awn_Col	AX-95097131	1B	24.64	32.9735	---NA---	---	---	NF	---	---	---	---	---	no IPS match	no IPS match	no IPS match
68	Awn_Att	AX-94519690	5A	59.99	32.9735	uncharacterized membrane protein At3g27390-like	TraesCS5A02G533800	TraesCS5A02G533600, TraesCS5A02G533700	<5	---	---	---	---	---	no IPS match	no IPS match	no IPS match
69	Awn_Att	AX-94453668	5A	59.99	691.028	---NA---	TraesCS5A02G533900	---	NF	---	---	---	---	---	mobidb-lite (MOBIDB_LITE)	no GO terms	no GO terms
70	Awn_Att	AX-94613491	5A	70.36	509.667	Hexose carrier protein HEX6	TraesCS4D02G365800	TraesCS4D02G365600, TraesCS4D02G365700, TraesCS4D02G365900	spike_z39-8.35	4	F:GO:0005351; C:GO:0005887; P:GO:0034219; P:GO:1902600	F:carbohydrate:proton symporter activity; C:integral component of plasma membrane; P:carbohydrate transmembrane transport; P:proton transmembrane transport	---	---	IPR003663 (PRINTS); IPR005828 (PFAM); IPR003663 (TIGRFAM); G3DSA:1.20.1250.20 (GENE3D); PTHR23500:SF18 (PANTHER); PTHR23500 (PANTHER); IPR020846 (PROSITE_PROFILES); IPR020846 (CDD); IPR036259 (SUPERFAMILY)	C:GO:0016020; C:GO:0016021; F:GO:0022857; P:GO:0055085	C:membrane; C:integral component of membrane; F:transmembrane transporter activity; P:transmembrane transport
71	Glu_Pub	AX-94506140	1A	50.59	590.818	---NA---	---	TraesCS7B02G335700, TraesCS7B02G335800	NHF	---	---	---	---	---	no IPS match	no IPS match	no IPS match
72	Glu_Pub	AX-94618537	1A	75.74	511.102	NAD(P)H dehydrogenase (quinone) FQR1-like	TraesCS1A02G320500	TraesCS1A02G320600	NF	---	---	---	---	---	no IPS match	no IPS match	no IPS match
73	Glu_Pub	AX-94626335	1B	24.64	90.9928	Metal tolerance protein 1	TraesCS1B02G090400	TraesCS1B02G090300	NF	6	C:GO:0000325; C:GO:0005774; P:GO:0006829; F:GO:0008324; C:GO:0016021; P:GO:0098655	C:plant-type vacuole; C:vacuolar membrane; P:zinc ion transport; F:cation transmembrane transporter activity; C:integral component of membrane; P:cation transmembrane transport	---	---	IPR002524 (PFAM); IPR002524 (TIGRFAM); IPR027469 (G3DSA:1.20.1510.GENE3D); mobidb-lite (MOBIDB_LITE); mobidb-lite (MOBIDB_LITE); mobidb-lite (MOBIDB_LITE); PTHR11562 (PANTHER); PTHR11562:SF80 (PANTHER); IPR027469 (SUPERFAMILY); IPR036837 (SUPERFAMILY)	P:GO:0006812; F:GO:0008324; C:GO:0016021; P:GO:0055085	P:cation transport; F:cation transmembrane transporter activity; C:integral component of membrane; P:transmembrane transport
74	Glu_Pub	AX-94664731	1B	24.64	296.98	Tetratricopeptide repeat protein SKI3	TraesCS1D02G211000	TraesCS1D02G210800, TraesCS1D02G210900, TraesCS1D02G211100	spike_z39-6.8	---	---	---	---	---	---	---	---
75	Glu_Pub	AX-95255429	2B	76.24	45.6837	---NA---	---	TraesCS2D02G094100	NF	---	---	---	---	---	no IPS match	no IPS match	no IPS match
76	Glu_Pub	AX-94852847	2B	76.38	72.8964	nicotianamine synthase 3	TraesCS2B02G111100	---	NF	2	F:GO:0030410; P:GO:0030418	F:nicotianamine synthase activity; P:nicotianamine biosynthetic process	EC:2.5.1.43	Nicotianamine synthase	G3DSA:3.40.50.150 (GENE3D); IPR004298 (PFAM); PTHR32266:SF10 (PANTHER); IPR004298 (PANTHER); IPR004298 (PROSITE_PROFILES); IPR029063 (SUPERFAMILY)	F:GO:0030410; P:GO:0030418	F:nicotianamine synthase activity; P:nicotianamine biosynthetic process
77	Glu_Pub	AX-95023665	2B	104.59	750.018	linoleate 9S-lipoxygenase	TraesCS2B02G555400	TraesCS2B02G555100, TraesCS2B02G555200	NF	7	P:GO:0001101; P:GO:0009725; F:GO:0016702; P:GO:0031408; F:GO:0046872; P:GO:0055114; P:GO:1901700	P:response to acid chemical; P:response to hormone; F:oxidoreductase activity, acting on single donors with incorporation of molecular oxygen, incorporation of two atoms of oxygen; P:oxylipin biosynthetic process; F:metal ion binding; P:oxidation-reduction process; P:response to oxygen-containing compound	EC:1.13.11	Acting on single donors with incorporation of molecular oxygen (oxygenases). The oxygen incorporated need not be derived from O(2)	mobidb-lite (MOBIDB_LITE); mobidb-lite (MOBIDB_LITE); mobidb-lite (MOBIDB_LITE)	no GO terms	no GO terms
78	Ear_Col	AX-94980178	1B	8.24	4.3461	Meiosis_protein_MEI2	TraesCS1B02G008000	TraesCS1B02G007800, TraesCS1B02G007900	NF	3	F:GO:0003676; C:GO:0005634; P:GO:0045292	F:nucleic acid binding; C:nucleus; P:mRNA cis splicing, via spliceosome	---	---	mobidb-lite (MOBIDB_LITE); mobidb-lite (MOBIDB_LITE); PTHR44127:SF7 (PANTHER); PTHR44127 (PANTHER)	no GO terms	no GO terms
79	Sh_Wid	AX-94654809	2D	208.85	80.8205	L-type lectin-domain containing receptor kinase IV.1-like	TraesCS2D02G137300	TraesCS2D02G137200, TraesCS2D02G137400	NF	5	F:GO:0004672; F:GO:0005524; P:GO:0006468; C:GO:0016021; F:GO:0030246	F:protein kinase activity; F:ATP binding; P:protein phosphorylation; C:integral component of membrane; F:carbohydrate binding	---	---	G3DSA:3.30.200.20 (GENE3D); IPR001220 (PFAM); IPR001245 (PFAM); G3DSA:2.60.120.200 (GENE3D); PTHR27007:SF28 (PANTHER); PTHR27007 (PANTHER); IPR000719 (PROSITE_PROFILES); IPR011009 (SUPERFAMILY); IPR013320 (SUPERFAMILY)	F:GO:0004672; F:GO:0005524; P:GO:0006468; F:GO:0030246	F:protein kinase activity; F:ATP binding; P:protein phosphorylation; F:carbohydrate binding
80	Grn_Ph	AX-94634529	2A	124.18	93.1909	---NA---	TraesCS2A02G150100LC	---	NF	---	---	---	---	---	no IPS match	no IPS match	no IPS match
81	Grn_Ph	AX-94608674	2A	124.18	568.945	putative serine/threonine-protein kinase isoform X1	TraesCS2D02G463100	TraesCS2D02G463000	grain_z85-16.59, spike_z65-5.73	4	F:GO:0004674; F:GO:0005524; C:GO:0005886; P:GO:0046777	F:protein serine/threonine kinase activity; F:ATP binding; C:plasma membrane; P:protein autophosphorylation	EC:2.7.11	Transferring phosphorus-containing groups	IPR020635 (SMART); G3DSA:3.30.200.20 (GENE3D); IPR001245 (PFAM); G3DSA:1.10.510.10 (GENE3D); PTHR27006 (PANTHER); PTHR27006 (PANTHER); PTHR27006:SF40 (PANTHER); IPR000719 (PROSITE_PROFILES); IPR011009 (SUPERFAMILY)	F:GO:0004672; F:GO:0004713; F:GO:0005524; P:GO:0006468	F:protein kinase activity; F:protein tyrosine kinase activity; F:ATP binding; P:protein phosphorylation
82	Grn_Ph	AX-94825053	2A	124.18	710.36	NB-LRR protein	---	TraesCS2A02G465600, TraesCS2A02G465700	<5	2	F:GO:0003677; F:GO:0043531	F:DNA binding; F:ADP binding	---	---	IPR032675 (G3DSA:3.80.10.GENE3D); PTHR44634 (PANTHER); SSF52058 (SUPERFAMILY)	no GO terms	no GO terms
83	Grn_Ph	AX-94738314	2A	124.32	711.075	probable nucleoredoxin 1-2	TraesCS2A02G466800	TraesCS2A02G466300, TraesCS2A02G466400, TraesCS2A02G466500, TraesCS2A02G466600, TraesCS2A02G466700	grain_z71-272.53, spike_z65-144.56	7	F:GO:0003677; F:GO:0004791; C:GO:0005634; P:GO:0045454; F:GO:0047134; P:GO:0055114; P:GO:0098869	F:DNA binding; F:thioredoxin-disulfide reductase activity; C:nucleus; P:cell redox homeostasis; F:protein-disulfide reductase activity; P:oxidation-reduction process; P:cellular oxidant detoxification	EC:1.8.1.9; EC:1.8.1.8	Thioredoxin-disulfide reductase; Protein-disulfide reductase	G3DSA:3.30.60.20 (GENE3D); G3DSA:3.40.30.10 (GENE3D); IPR004146 (PFAM); IPR012336 (PFAM); PTHR13871:SF85 (PANTHER); PTHR13871 (PANTHER); SSF57889 (SUPERFAMILY); IPR036249 (SUPERFAMILY)	no GO terms	no GO terms
84	Grn_Ph	AX-95205011	2A	124.89	573.97	uncharacterized protein LOC109762314	TraesCS2D02G468800	TraesCS2D02G468700	<5	1	C:GO:0016021	C:integral component of membrane	---	---	PR01217 (PRINTS); IPR007658 (PFAM); IPR025315 (PFAM); mobidb-lite (MOBIDB_LITE); mobidb-lite (MOBIDB_LITE); mobidb-lite (MOBIDB_LITE); mobidb-lite (MOBIDB_LITE); PTHR31325:SF90 (PANTHER); PTHR31325 (PANTHER)	no GO terms	no GO terms
85	Grn_Ph	AX-94833084	2A	124.89	690.211	exopolygalacturonase	TraesCS2B02G491900	TraesCS2B02G492000	NF	5	F:GO:0004650; C:GO:0005576; P:GO:0005975; F:GO:0016829; P:GO:0071555	F:polygalacturonase activity; C:extracellular region; P:carbohydrate metabolic process; F:lyase activity; P:cell wall organization	EC:3.2.1.15	Polygalacturonase	IPR006626 (SMART); IPR012334 (G3DSA:2.160.20.GENE3D); IPR000743 (PFAM); PTHR31375 (PANTHER); PTHR31375:SF11 (PANTHER); IPR011050 (SUPERFAMILY)	F:GO:0004650; P:GO:0005975	F:polygalacturonase activity; P:carbohydrate metabolic process
86	Grn_Ph	AX-94635076	2A	124.89	574.351	myosin-3-like	TraesCS2D02G469200	TraesCS2D02G469100, TraesCS2D02G469300, TraesCS2D02G469400	grain_z71-8.42, spike_z32-32.31	---	---	---	---	---	mobidb-lite (MOBIDB_LITE); mobidb-lite (MOBIDB_LITE); PTHR31071:SF12 (PANTHER); PTHR31071 (PANTHER)	no GO terms	no GO terms
87	Grn_Ph	AX-94750566	2A	124.89	711.976	---NA---	TraesCS2A02G467800	TraesCS2A02G467700, TraesCS2A02G467900	grain_z71-24.92	---	---	---	---	---	no IPS match	no IPS match	no IPS match
88	Grn_Ph	AX-94485323	2A	126.58	577.599	APO protein 4, mitochondrial	TraesCS2D02G474900	TraesCS2D02G474800, TraesCS2D02G475000, TraesCS2D02G475100	<5	2	F:GO:0003743; P:GO:0006413	F:translation initiation factor activity; P:translational initiation	---	---	IPR023342 (PFAM); PTHR10388 (PANTHER); PTHR10388:SF20 (PANTHER); IPR023342 (PROSITE_PROFILES); IPR023342 (PROSITE_PROFILES)	F:GO:0003723	F:RNA binding
89	Germ_Wid	AX-94921234	4A	115.15	612.114	cleavage and polyadenylation specificity factor subunit 3-I	TraesCS4A02G324800	TraesCS4A02G324600, TraesCS4A02G324700	grain_z85-19.43	8	F:GO:0003723; F:GO:0004521; C:GO:0005847; P:GO:0006378; P:GO:0006398; F:GO:0008409; P:GO:0016180; P:GO:0090502	F:RNA binding; F:endoribonuclease activity; C:mRNA cleavage and polyadenylation specificity factor complex; P:mRNA polyadenylation; P:mRNA 3'-end processing by stem-loop binding and cleavage; F:5'-3' exonuclease activity; P:snRNA processing; P:RNA phosphodiester bond hydrolysis, endonucleolytic	---	---	IPR021718 (SMART); IPR036866 (G3DSA:3.60.15.GENE3D); IPR021718 (PFAM); IPR011108 (PFAM); PTHR11203 (PANTHER); PTHR11203:SF11 (PANTHER); IPR036866 (SUPERFAMILY)	no GO terms	no GO terms
90	Brush_L	AX-94623333	3A	115.9	478.53	sialyltransferase-like protein 1	TraesCS3D02G364600	TraesCS3D02G364700	<5	5	C:GO:0000139; P:GO:0006486; F:GO:0008373; C:GO:0016021; P:GO:0097503	C:Golgi membrane; P:protein glycosylation; F:sialyltransferase activity; C:integral component of membrane; P:sialylation	EC:2.4.99	Glycosyltransferases	IPR001675 (PFAM); IPR038578 (G3DSA:3.90.1480.GENE3D); PTHR13713:SF58 (PANTHER); PTHR13713 (PANTHER)	P:GO:0006486; F:GO:0008373	P:protein glycosylation; F:sialyltransferase activity
91	Grn_Size	AX-95154008	7B	93.52	655.019	neurofilament heavy polypeptide-like	TraesCS7B02G652700LC	TraesCS7B02G388800	NHF	---	---	---	---	---	mobidb-lite (MOBIDB_LITE); mobidb-lite (MOBIDB_LITE); mobidb-lite (MOBIDB_LITE)	no GO terms	no GO terms
92	Grn_Size	AX-95002032	1A	74.11	637.962	Retrotransposon-like protein	---	TraesCS3A02G388900	NHF	---	---	---	---	---	IPR025476 (PFAM); PTHR10492 (PANTHER); PTHR10492:SF48 (PANTHER)	no GO terms	no GO terms
93	Grn_Tex	AX-94471990	6B	62.83	NA	metal-nicotianamine transporter YSL2	---	---	NF	---	---	---	---	---	---	---	---
94	Grn_Tex	AX-94451759	6B	62.83	506.875	retrotransposon protein, putative, unclassified	TraesCS6B02G280900	TraesCS6B02G280800	NHF	6	C:GO:0000145; F:GO:0003964; P:GO:0006278; P:GO:0006887; C:GO:0016020; C:GO:0016021	C:exocyst; F:RNA-directed DNA polymerase activity; P:RNA-dependent DNA biosynthetic process; P:exocytosis; C:membrane; C:integral component of membrane	---	---	no IPS match	no IPS match	no IPS match
95	Grn_Tex	AX-95148325	6B	62.83	320.715	BEACH domain-containing protein C2	TraesCS6D02G229300	---	<5	---	---	---	---	---	IPR001680 (SMART); IPR015943 (G3DSA:2.130.10.GENE3D); IPR001680 (PFAM); IPR015943 (G3DSA:2.130.10.GENE3D); mobidb-lite (MOBIDB_LITE); mobidb-lite (MOBIDB_LITE); PTHR13743:SF107 (PANTHER); PTHR13743 (PANTHER); IPR017986 (PROSITE_PROFILES); IPR001680 (PROSITE_PROFILES); IPR036322 (SUPERFAMILY)	F:GO:0005515	F:protein binding
96	Grn_Tex	AX-95086436	6B	62.83	500.21	probable trehalose-phosphate phosphatase 1	TraesCS6B02G276300	TraesCS6B02G276400, TraesCS6B02G276500	NF	5	F:GO:0004805; P:GO:0005992; P:GO:0009409; P:GO:0009651; P:GO:0016311	F:trehalose-phosphatase activity; P:trehalose biosynthetic process; P:response to cold; P:response to salt stress; P:dephosphorylation	EC:3.1.3.12	Trehalose-phosphatase	IPR023214 (G3DSA:3.40.50.GENE3D); IPR003337 (PFAM); mobidb-lite (MOBIDB_LITE); mobidb-lite (MOBIDB_LITE); PTHR43768 (PANTHER); PTHR43768:SF14 (PANTHER); IPR036412 (SUPERFAMILY)	F:GO:0003824; P:GO:0005992	F:catalytic activity; P:trehalose biosynthetic process
97	Grn_Tex	AX-95172836	7A	100.09	667.337	---NA---	---	---	NF	---	---	---	---	---	no IPS match	no IPS match	no IPS match
98	Grn_Tex	AX-94464653	7A	100.09	666.807	predicted protein	TraesCS7A02G470700	TraesCS7A02G470600	grain_71-15.4	2	F:GO:0003677; C:GO:0005634	F:DNA binding; C:nucleus	---	---	no IPS match	no IPS match	no IPS match
99	Grn_Tex	AX-94583333	7A	100.52	638.885	ATP-dependent zinc metalloprotease FTSH 2, chloroplastic	TraesCS7B02G373000	TraesCS7B02G373100	NF	12	F:GO:0004176; F:GO:0004222; F:GO:0005524; P:GO:0006508; F:GO:0008270; C:GO:0009535; C:GO:0009941; P:GO:0010027; P:GO:0010205; P:GO:0010206; P:GO:0010304; C:GO:0016021	F:ATP-dependent peptidase activity; F:metalloendopeptidase activity; F:ATP binding; P:proteolysis; F:zinc ion binding; C:chloroplast thylakoid membrane; C:chloroplast envelope; P:thylakoid membrane organization; P:photoinhibition; P:photosystem II repair; P:PSII associated light-harvesting complex II catabolic process; C:integral component of membrane	EC:3.4.24; EC:3.6.1.3; EC:3.6.1.15	Acting on peptide bonds (peptidases); Adenosinetriphosphatase; Nucleoside-triphosphate phosphatase	G3DSA:1.20.58.760 (GENE3D); IPR000642 (PFAM); G3DSA:1.20.58.760 (GENE3D); PTHR23076:SF54 (PANTHER); PTHR23076 (PANTHER); IPR037219 (SUPERFAMILY)	F:GO:0004222; F:GO:0005524; P:GO:0006508	F:metalloendopeptidase activity; F:ATP binding; P:proteolysis
100	DTH	AX-94542441	4A	78.09	585.03	shikimate kinase-like protein	TraesCS4A02G276900	TraesCS4A02G277000	NF	2	F:GO:0016301; P:GO:0016310	F:kinase activity; P:phosphorylation	---	---	PTHR34560 (PANTHER); PTHR34560:SF1 (PANTHER)	no GO terms	no GO terms
101	DTH	AX-94699167	5A	11.38	586.6	two pore potassium channel a	TraesCS5A02G541400LC	TraesCS5A02G391400, TraesCS5A02G391300	NF	9	F:GO:0005242; F:GO:0005509; C:GO:0005887; C:GO:0009705; F:GO:0022841; P:GO:0030007; P:GO:0030322; C:GO:0031004; P:GO:0071805	F:inward rectifier potassium channel activity; F:calcium ion binding; C:integral component of plasma membrane; C:plant-type vacuole membrane; F:potassium ion leak channel activity; P:cellular potassium ion homeostasis; P:stabilization of membrane potential; C:potassium ion-transporting ATPase complex; P:potassium ion transmembrane transport	---	---	IPR003280 (PRINTS); G3DSA:1.10.287.70 (GENE3D); IPR013099 (PFAM); PTHR11003 (PANTHER); IPR031144 (PTHR11003:PANTHER); SSF81324 (SUPERFAMILY); SSF81324 (SUPERFAMILY)	F:GO:0005249; F:GO:0005267; C:GO:0005774; C:GO:0016020; P:GO:0030007; P:GO:0071805	F:voltage-gated potassium channel activity; F:potassium channel activity; C:vacuolar membrane; C:membrane; P:cellular potassium ion homeostasis; P:potassium ion transmembrane transport
102	DTH	AX-95025549	5A	72.22	NA	OTU domain-containing protein	---	---	Stem_z30-6.37	---	---	---	---	---	---	---	---
103	DTH	AX-95187165	5A	89.02	412.61	protein ROOT PRIMORDIUM DEFECTIVE 1	TraesCS5D02G320500	---	<5	3	P:GO:0008285; P:GO:0010102; C:GO:0016021	P:negative regulation of cell population proliferation; P:lateral root morphogenesis; C:integral component of membrane	---	---	IPR021099 (PFAM); mobidb-lite (MOBIDB_LITE); IPR040295 (PTHR31476:PANTHER); PTHR31476 (PANTHER)	no GO terms	no GO terms
104	DTH	AX-94508292	7D	127.78	512.75	zinc finger protein WIP2	TraesCS7D02G397800	---	<5	4	F:GO:0003676; C:GO:0005634; P:GO:0010468; P:GO:0080022	F:nucleic acid binding; C:nucleus; P:regulation of gene expression; P:primary root development	---	---	G3DSA:3.30.160.60 (GENE3D); mobidb-lite (MOBIDB_LITE); mobidb-lite (MOBIDB_LITE); PTHR10593 (PANTHER); PTHR10593:SF61 (PANTHER); IPR013087 (PROSITE_PROFILES); IPR036236 (SUPERFAMILY)	F:GO:0003676	F:nucleic acid binding
105	DTM	AX-95652739	1A	54.04	7.64	defensin	TraesCS1A02G013600	TraesCS1A02G013700, TraesCS1A02G013900	grain_z71-6.3, spike_z32-30.01	4	C:GO:0005615; P:GO:0006952; F:GO:0046870; P:GO:0055073	C:extracellular space; P:defense response; F:cadmium ion binding; P:cadmium ion homeostasis	---	---	IPR008176 (PRINTS); IPR003614 (SMART); IPR036574 (G3DSA:3.30.30.GENE3D); PF00304 (PFAM); PTHR33147 (PANTHER); PTHR33147:SF23 (PANTHER); IPR036574 (SUPERFAMILY)	P:GO:0006952	P:defense response
106	DTM	AX-94656878	2A	83.23	88.01	bZIP transcription factor	TraesCS2A02G142800	TraesCS2A02G142900	grain_z85-56.26, spike_z32-33.03	6	F:GO:0003677; F:GO:0003700; C:GO:0005634; C:GO:0005789; P:GO:0006990; C:GO:0016021	F:DNA binding; F:DNA-binding transcription factor activity; C:nucleus; C:endoplasmic reticulum membrane; P:positive regulation of transcription from RNA polymerase II promoter involved in unfolded protein response; C:integral component of membrane	---	---	PTHR22952:SF139 (PANTHER); PTHR22952 (PANTHER)	no GO terms	no GO terms
107	DTM	AX-94463225	2A	179.61	764.09	BTB/POZ domain and ankyrin repeat-containing protein NPR1	TraesCS2A02G563400	TraesCS2A02G563200, TraesCS2A02G563300, TraesCS2A02G563500	grain_z71-5052, spike_z32-13.32	10	F:GO:0005515; C:GO:0005634; C:GO:0005737; P:GO:0009627; P:GO:0009628; P:GO:0009966; P:GO:0031347; P:GO:0042742; P:GO:0050832; P:GO:0080027	F:protein binding; C:nucleus; C:cytoplasm; P:systemic acquired resistance; P:response to abiotic stimulus; P:regulation of signal transduction; P:regulation of defense response; P:defense response to bacterium; P:defense response to fungus; P:response to herbivore	---	---	IPR021094 (PFAM)	no GO terms	no GO terms
108	DTM	AX-94657523	2A	179.61	764.09	BTB/POZ domain and ankyrin repeat-containing protein NPR1	TraesCS2A02G563400	TraesCS2A02G563200, TraesCS2A02G563300, TraesCS2A02G563500	grain_z71-5.52, spike_z32-13.32	10	F:GO:0005515; C:GO:0005634; C:GO:0005737; P:GO:0009627; P:GO:0009628; P:GO:0009966; P:GO:0031347; P:GO:0042742; P:GO:0050832; P:GO:0080027	F:protein binding; C:nucleus; C:cytoplasm; P:systemic acquired resistance; P:response to abiotic stimulus; P:regulation of signal transduction; P:regulation of defense response; P:defense response to bacterium; P:defense response to fungus; P:response to herbivore	---	---	IPR021094 (PFAM)	no GO terms	no GO terms
109	DTM	AX-94681125	3B	61.38	31.74	Lactation elevated protein 1	TraesCS3A02G054200	---	spike_z65-14.49, grain_z85-12.57	3	F:GO:0005524; C:GO:0005739; F:GO:0016887	F:ATP binding; C:mitochondrion; F:ATPase activity	EC:3.6.1.3; EC:3.6.1.15	Adenosinetriphosphatase; Nucleoside-triphosphate phosphatase	no IPS match	no IPS match	no IPS match
110	DTM	AX-95115735	3B	84.9	232.56	predicted protein	TraesCS3B02G282810LC	---	NF	2	C:GO:0016020; C:GO:0016021	C:membrane; C:integral component of membrane	---	---	no IPS match	no IPS match	no IPS match
111	DTM	AX-94541758	3B	85.27	219.47	E3 ubiquitin-protein ligase UPL6 isoform X1	---	---	NF	6	P:GO:0000209; F:GO:0004842; P:GO:0006511; P:GO:0016567; F:GO:0016740; F:GO:0061631	P:protein polyubiquitination; F:ubiquitin-protein transferase activity; P:ubiquitin-dependent protein catabolic process; P:protein ubiquitination; F:transferase activity; F:ubiquitin conjugating enzyme activity	---	---	no IPS match	no IPS match	no IPS match
112	DTM	AX-94542441	4A	78.09	585.03	shikimate kinase-like protein	TraesCS4A02G276900	TraesCS4A02G277000	NF	2	F:GO:0016301; P:GO:0016310	F:kinase activity; P:phosphorylation	---	---	PTHR34560 (PANTHER); PTHR34560:SF1 (PANTHER)	no GO terms	no GO terms
113	DTM	AX-95652310	5A	72.22	NA	---	---	---	NF	---	---	---	---	---	---	---	---
114	DTM	AX-95187165	5A	89.02	412.61	protein ROOT PRIMORDIUM DEFECTIVE 1	TraesCS5D02G320500	---	<5	3	P:GO:0008285; P:GO:0010102; C:GO:0016021	P:negative regulation of cell population proliferation; P:lateral root morphogenesis; C:integral component of membrane	---	---	IPR021099 (PFAM); mobidb-lite (MOBIDB_LITE); IPR040295 (PTHR31476:PANTHER); PTHR31476 (PANTHER)	no GO terms	no GO terms
115	DTM	AX-95229606	6A	78.85	673.01	auxilin-related protein 2-like	TraesCS2A02G575000LC	---	NF	---	---	---	---	---	no IPS match	no IPS match	no IPS match
116	DTM	AX-95653321	6B	62.83	398.55	tRNA (guanine(37)-N1)-methyltransferase	TraesCS6A02G216600	TraesCS6A02G216500	NF	5	P:GO:0002939; C:GO:0005634; C:GO:0005759; C:GO:0005829; F:GO:0052906	P:tRNA N1-guanine methylation; C:nucleus; C:mitochondrial matrix; C:cytosol; F:tRNA (guanine(37)-N(1))-methyltransferase activity	EC:2.1.1.228	tRNA (guanine(37)-N(1))-methyltransferase	G3DSA:3.40.50.150 (GENE3D); IPR030382 (PFAM); mobidb-lite (MOBIDB_LITE); mobidb-lite (MOBIDB_LITE); PTHR23245:SF36 (PANTHER); PTHR23245 (PANTHER); IPR030382 (PROSITE_PROFILES); cd02440 (CDD); IPR029063 (SUPERFAMILY)	no GO terms	no GO terms
117	PH	AX-95652981	1B	24.64	282.28	---NA---	TraesCS1B02G311600LC	---	NF	---	---	---	---	---	mobidb-lite (MOBIDB_LITE); mobidb-lite (MOBIDB_LITE); mobidb-lite (MOBIDB_LITE)	no GO terms	no GO terms
118	PH	AX-94656878	2A	83.23	88.01	bZIP transcription factor	TraesCS2A02G142800	TraesCS2A02G142900	grain_z85-56.26, spike_z32-33.03	6	F:GO:0003677; F:GO:0003700; C:GO:0005634; C:GO:0005789; P:GO:0006990; C:GO:0016021	F:DNA binding; F:DNA-binding transcription factor activity; C:nucleus; C:endoplasmic reticulum membrane; P:positive regulation of transcription from RNA polymerase II promoter involved in unfolded protein response; C:integral component of membrane	---	---	PTHR22952:SF139 (PANTHER); PTHR22952 (PANTHER)	no GO terms	no GO terms
119	PH	AX-94841650	2B	104.59	609.3	protein FAR1-RELATED SEQUENCE 5-like	TraesCS2D02G519400	---	NF	3	F:GO:0003676; P:GO:0006355; F:GO:0008270	F:nucleic acid binding; P:regulation of transcription, DNA-templated; F:zinc ion binding	---	---	no IPS match	no IPS match	no IPS match
120	PH	AX-94737415	5D	1.58	712	4-coumarate--CoA ligase-like 7, Auxin Binding Protein-1	TraesCS5B02G570100	TraesCS5B02G570200, TraesCS5B02G570300	NF	4	F:GO:0000166; F:GO:0003824; F:GO:0005524; F:GO:0016874	F:nucleotide binding; F:catalytic activity; F:ATP binding; F:ligase activity	---	---	IPR025110 (PFAM); G3DSA:3.30.300.30 (GENE3D); PTHR24096 (PANTHER); PTHR24096:SF269 (PANTHER); SSF56801 (SUPERFAMILY)	no GO terms	no GO terms
121	PH	AX-95170041	5D	1.58	NA	---	---	---	NF	---	---	---	---	---	---	---	---
122	PH	AX-94941145	7A	29.9	19.49	probable LRR receptor-like serine/threonine-protein kinase At3g47570	TraesCS7A02G042100	TraesCS7A02G042200	NF	3	C:GO:0016020; F:GO:0016301; P:GO:0016310	C:membrane; F:kinase activity; P:phosphorylation	---	---	IPR003591 (SMART); IPR032675 (G3DSA:3.80.10.GENE3D); IPR013210 (PFAM); IPR001611 (PFAM); IPR032675 (G3DSA:3.80.10.GENE3D); PTHR43887 (PANTHER); PTHR43887:SF15 (PANTHER); PTHR43887:SF15 (PANTHER); SSF52058 (SUPERFAMILY)	F:GO:0005515	F:protein binding
123	SL	AX-94981940	1B	24.64	112.2	Replication protein A subunit	TraesCS1B02G102200	TraesCS1B02G102100	spike_z32-6.71	---	---	---	---	---	IPR001878 (SMART); IPR001878 (PFAM); IPR031657 (PFAM); IPR013955 (PFAM); G3DSA:2.40.50.140 (GENE3D); G3DSA:4.10.60.10 (GENE3D); G3DSA:2.40.50.140 (GENE3D); PTHR23273:SF12 (PANTHER); PTHR23273 (PANTHER); IPR001878 (PROSITE_PROFILES); IPR001878 (PROSITE_PROFILES); IPR013955 (CDD); cd04475 (CDD); IPR012340 (SUPERFAMILY); IPR012340 (SUPERFAMILY); IPR036875 (SUPERFAMILY)	F:GO:0003676; F:GO:0008270	F:nucleic acid binding; F:zinc ion binding
124	SL	AX-94544160	1B	24.64	NA	carboxypeptidase D	---	---	spike_z32-6.71	---	---	---	---	---	---	---	---
125	SL	AX-94561972	1B	24.64	92.87	basic region/leucine zipper protein	TraesCS1B02G091500	TraesCS1B02G091600, TraesCS1B02G091400	NF	9	F:GO:0003700; C:GO:0005634; P:GO:0006971; P:GO:0009267; F:GO:0043565; F:GO:0044212; P:GO:0045893; F:GO:0046982; P:GO:2000693	F:DNA-binding transcription factor activity; C:nucleus; P:hypotonic response; P:cellular response to starvation; F:sequence-specific DNA binding; F:transcription regulatory region DNA binding; P:positive regulation of transcription, DNA-templated; F:protein heterodimerization activity; P:positive regulation of seed maturation	---	---	IPR004827 (SMART); IPR004827 (PFAM); G3DSA:1.20.5.170 (GENE3D); mobidb-lite (MOBIDB_LITE); mobidb-lite (MOBIDB_LITE); mobidb-lite (MOBIDB_LITE); PTHR22952 (PANTHER); PTHR22952:SF361 (PANTHER); IPR004827 (PROSITE_PROFILES); SSF57959 (SUPERFAMILY)	F:GO:0003700; P:GO:0006355	F:DNA-binding transcription factor activity; P:regulation of transcription, DNA-templated
126	SL	AX-94517196	2A	83.23	528.27	OSJNBa0006B20.20-like protein	TraesCS2A02G307500	---	spike_z39-14.81,grain_z71-12.24	1	C:GO:0016021	C:integral component of membrane	---	---	PTHR28110 (PANTHER)	no GO terms	no GO terms
127	SL	AX-94702246	2A	83.23	403.21	putative lipoxygenase 5	TraesCS2D02G313400	---	spike_z32-41.69	4	F:GO:0016165; P:GO:0031408; F:GO:0046872; P:GO:0055114	F:linoleate 13S-lipoxygenase activity; P:oxylipin biosynthetic process; F:metal ion binding; P:oxidation-reduction process	EC:1.13.11; EC:1.13.11.12	Acting on single donors with incorporation of molecular oxygen (oxygenases). The oxygen incorporated need not be derived from O(2); Linoleate 13S-lipoxygenase	IPR013819 (PFAM); G3DSA:1.20.245.10 (GENE3D); PTHR11771:SF67 (PANTHER); IPR000907 (PANTHER); IPR013819 (PROSITE_PROFILES); IPR036226 (SUPERFAMILY)	F:GO:0016702; F:GO:0046872; P:GO:0055114	F:oxidoreductase activity, acting on single donors with incorporation of molecular oxygen, incorporation of two atoms of oxygen; F:metal ion binding; P:oxidation-reduction process
128	SL	AX-94491035	2A	83.23	NA	---	---	---	NF	---	---	---	---	---	---	---	---
129	SL	AX-95101251	2A	83.23	541.84	predicted protein	TraesCS2A02G316100	TraesCS2A02G315900, TraesCS2A02G316000, TraesCS2A02G316200	<5	1	C:GO:0016021	C:integral component of membrane	---	---	IPR013083 (G3DSA:3.30.40.GENE3D); IPR012866 (PFAM); mobidb-lite (MOBIDB_LITE); mobidb-lite (MOBIDB_LITE); PTHR31197 (PANTHER); PTHR31197:SF11 (PANTHER)	no GO terms	no GO terms
130	SL	AX-94539318	3A	84.43	559.54	---NA---	TraesCS3A02G318400	TraesCS3A02G318200, TraesCS3A02G318300	spike_z39-14.71	---	---	---	---	---	PTHR10281 (PANTHER); PTHR10281:SF68 (PANTHER)	no GO terms	no GO terms
131	SL	AX-95252004	3B	85.27	173.62	rhomboid-like protein 14, mitochondrial	TraesCS3D02G187100	TraesCS3D02G186900, TraesCS3D02G187000, TraesCS3D02G187200	<5	9	F:GO:0004252; P:GO:0010033; C:GO:0016021; P:GO:0033554; P:GO:0033619; P:GO:0044267; C:GO:0044432; F:GO:0046872; P:GO:0048518	F:serine-type endopeptidase activity; P:response to organic substance; C:integral component of membrane; P:cellular response to stress; P:membrane protein proteolysis; P:cellular protein metabolic process; C:endoplasmic reticulum part; F:metal ion binding; P:positive regulation of biological process	EC:3.4.21	Acting on peptide bonds (peptidases)	IPR035952 (G3DSA:1.20.1540.GENE3D); IPR022764 (PFAM); PTHR44836 (PANTHER); IPR001876 (PROSITE_PROFILES); SSF144091 (SUPERFAMILY)	F:GO:0004252; C:GO:0016021	F:serine-type endopeptidase activity; C:integral component of membrane
132	SL	AX-94390305	3D	175.97	813.97	---NA---	TraesCS3B02G872600LC	TraesCS3B02G587400, TraesCS3B02G587600, TraesCS3B02G587700	NF	---	---	---	---	---	no IPS match	no IPS match	no IPS match
133	SL	AX-94722223	5A	70.36	612.93	actin-related protein 2/3 complex subunit 3	TraesCS7D02G509500	TraesCS7D02G509300, TraesCS7D02G509400, TraesCS7D02G509600	spike_z65-11.84	4	C:GO:0005737; C:GO:0005885; P:GO:0034314; F:GO:0051015	C:cytoplasm; C:Arp2/3 protein complex; P:Arp2/3 complex-mediated actin nucleation; F:actin filament binding	---	---	IPR007204 (PFAM); IPR036753 (G3DSA:1.10.1760.GENE3D); IPR007204 (PANTHER); IPR036753 (SUPERFAMILY)	C:GO:0005856; C:GO:0005885; P:GO:0030833; P:GO:0034314	C:cytoskeleton; C:Arp2/3 protein complex; P:regulation of actin filament polymerization; P:Arp2/3 complex-mediated actin nucleation
134	SL	AX-94976078	7A	24.94	40.87	---NA---	---	TraesCS7D02G069900	NF	---	---	---	---	---	no IPS match	no IPS match	no IPS match
135	SL	AX-94551053	7B	1.72	741.57	Cell_elongation_protein_DIMINUTO [delta(24)-sterol reductase]	TraesCS7B02G484200	TraesCS7B02G483900, TraesCS7B02G484000, TraesCS7B02G484100, TraesCS7B02G484400, TraesCS7B02G484300	spike_z32-42.4	11	F:GO:0005516; C:GO:0005774; C:GO:0005886; P:GO:0009808; P:GO:0009826; P:GO:0009834; C:GO:0016021; P:GO:0016132; F:GO:0016628; P:GO:0055114; F:GO:0071949	F:calmodulin binding; C:vacuolar membrane; C:plasma membrane; P:lignin metabolic process; P:unidimensional cell growth; P:plant-type secondary cell wall biogenesis; C:integral component of membrane; P:brassinosteroid biosynthetic process; F:oxidoreductase activity, acting on the CH-CH group of donors, NAD or NADP as acceptor; P:oxidation-reduction process; F:FAD binding	---	---	IPR006094 (PFAM); IPR016169 (G3DSA:3.30.465.GENE3D); IPR040165 (PANTHER); PTHR10801:SF0 (PANTHER); IPR016166 (PROSITE_PROFILES); IPR036318 (SUPERFAMILY)	F:GO:0016491; F:GO:0050660; P:GO:0055114; F:GO:0071949	F:oxidoreductase activity; F:flavin adenine dinucleotide binding; P:oxidation-reduction process; F:FAD binding
136	Awn_L	AX-94844716	1B	26.22	480.82	predicted protein	TraesCS1B02G273600	TraesCS1B02G273700, TraesCS1B02G273800, TraesCS1B02G273900	spike_z65-8.93	1	C:GO:0016021	C:integral component of membrane	---	---	G3DSA:3.40.1740.10 (GENE3D); IPR003774 (PFAM); mobidb-lite (MOBIDB_LITE); PTHR31984:SF10 (PANTHER); PTHR31984 (PANTHER); SSF143456 (SUPERFAMILY)	no GO terms	no GO terms
137	Awn_L	AX-94401263	3B	85.27	581.03	putative ADP-ribosylation factor	TraesCS3B02G368600	---	spike_z39-231.96, grain_z71-126.05	1	F:GO:0005525	F:GTP binding	---	---	no IPS match	no IPS match	no IPS match
138	Awn_L	AX-94807852	4B	94.44	19.44	myosin-binding protein 2	TraesCS4D02G041500	TraesCS4D02G041200, TraesCS4D02G041300, TraesCS4D02G041400, TraesCS4D02G041600	spike_z39-9.49	2	C:GO:0016021; F:GO:0017022	C:integral component of membrane; F:myosin binding	---	---	IPR007656 (PFAM); mobidb-lite (MOBIDB_LITE); mobidb-lite (MOBIDB_LITE); mobidb-lite (MOBIDB_LITE); mobidb-lite (MOBIDB_LITE); mobidb-lite (MOBIDB_LITE); PTHR31448:SF23 (PANTHER); IPR039306 (PANTHER); IPR007656 (PROSITE_PROFILES)	F:GO:0017022	F:myosin binding
139	Awn_L	AX-94895991	4B	96.85	16.92	Oxysterol-binding protein-related protein 1C	TraesCS4D02G039500	TraesCS4D02G039600	spike_z39-24.31	6	C:GO:0005829; F:GO:0015248; P:GO:0015918; C:GO:0016021; F:GO:0032934; C:GO:0043231	C:cytosol; F:sterol transporter activity; P:sterol transport; C:integral component of membrane; F:sterol binding; C:intracellular membrane-bounded organelle	---	---	PTHR10972:SF100 (PANTHER); IPR000648 (PANTHER); IPR037239 (SUPERFAMILY)	no GO terms	no GO terms
140	Awn_L	AX-94594057	6D	17.65	507.51	mediator of RNA polymerase II transcription subunit 27 isoform X1	---	TraesCS3B02G316000, TraesCS3B02G316100, TraesCS3B02G316200	NF	10	P:GO:0006777; P:GO:0010467; C:GO:0019008; P:GO:0043039; F:GO:0046872; F:GO:0051539; P:GO:0090305; F:GO:0097159; F:GO:0140101; F:GO:1901363	P:Mo-molybdopterin cofactor biosynthetic process; P:gene expression; C:molybdopterin synthase complex; P:tRNA aminoacylation; F:metal ion binding; F:4 iron, 4 sulfur cluster binding; P:nucleic acid phosphodiester bond hydrolysis; F:organic cyclic compound binding; F:catalytic activity, acting on a tRNA; F:heterocyclic compound binding	---	---	no IPS match	no IPS match	no IPS match
141	Awn_L	AX-94474462	6D	17.65	561.14	---NA---	---	TraesCS6B02G313100	NF	---	---	---	---	---	no IPS match	no IPS match	no IPS match
142	Awn_L	AX-95012310	7B	1.72	634.69	Cell_elongation_protein_DIMINUTO [delta(24)-sterol reductase]	TraesCS7D02G550700	TraesCS7D02G550300, TraesCS7D02G550400, TraesCS7D02G550500, TraesCS7D02G550600, TraesCS7D02G550800, TraesCS7D02G550900, TraesCS7D02G551000	spike_z32-42.4	11	F:GO:0005516; C:GO:0005774; C:GO:0005886; P:GO:0009808; P:GO:0009826; P:GO:0009834; C:GO:0016021; P:GO:0016132; F:GO:0016628; P:GO:0055114; F:GO:0071949	F:calmodulin binding; C:vacuolar membrane; C:plasma membrane; P:lignin metabolic process; P:unidimensional cell growth; P:plant-type secondary cell wall biogenesis; C:integral component of membrane; P:brassinosteroid biosynthetic process; F:oxidoreductase activity, acting on the CH-CH group of donors, NAD or NADP as acceptor; P:oxidation-reduction process; F:FAD binding	---	---	IPR006094 (PFAM); IPR016169 (G3DSA:3.30.465.GENE3D); mobidb-lite (MOBIDB_LITE); PTHR10801:SF0 (PANTHER); IPR040165 (PANTHER); IPR016166 (PROSITE_PROFILES); IPR036318 (SUPERFAMILY)	F:GO:0016491; F:GO:0050660; P:GO:0055114; F:GO:0071949	F:oxidoreductase activity; F:flavin adenine dinucleotide binding; P:oxidation-reduction process; F:FAD binding
143	Awn_L	AX-95025537	7B	2.5	741.57	Cell_elongation_protein_DIMINUTO [delta(24)-sterol reductase]	TraesCS7B02G484200	TraesCS7B02G483900, TraesCS7B02G484000, TraesCS7B02G484100, TraesCS7B02G484400, TraesCS7B02G484300	spike_z32-42.4	11	F:GO:0005516; C:GO:0005774; C:GO:0005886; P:GO:0009808; P:GO:0009826; P:GO:0009834; C:GO:0016021; P:GO:0016132; F:GO:0016628; P:GO:0055114; F:GO:0071949	F:calmodulin binding; C:vacuolar membrane; C:plasma membrane; P:lignin metabolic process; P:unidimensional cell growth; P:plant-type secondary cell wall biogenesis; C:integral component of membrane; P:brassinosteroid biosynthetic process; F:oxidoreductase activity, acting on the CH-CH group of donors, NAD or NADP as acceptor; P:oxidation-reduction process; F:FAD binding	---	---	IPR016169 (G3DSA:3.30.465.GENE3D); IPR006094 (PFAM); mobidb-lite (MOBIDB_LITE); PTHR10801:SF0 (PANTHER); IPR040165 (PANTHER); IPR016166 (PROSITE_PROFILES); IPR036318 (SUPERFAMILY)	F:GO:0016491; F:GO:0050660; P:GO:0055114; F:GO:0071949	F:oxidoreductase activity; F:flavin adenine dinucleotide binding; P:oxidation-reduction process; F:FAD binding
144	Leaf_L	AX-94675921	4A	214.31	388.34	uncharacterized protein LOC109772591	TraesCS5D02G289900	TraesCS5D02G289800, TraesCS5D02G290000	NHF	---	---	---	---	---	PTHR32133 (PANTHER); IPR036047 (SUPERFAMILY)	F:GO:0005515	F:protein binding
145	Leaf_L	AX-94406861	5A	52.73	692.06	qLTG3-1	TraesCS5A02G535400	TraesCS5A02G535300	NF	---	---	---	---	---	IPR016140 (SMART); IPR027923 (PFAM); G3DSA:1.10.110.10 (GENE3D); mobidb-lite (MOBIDB_LITE); PTHR31731 (PANTHER); PTHR31731:SF58 (PANTHER); IPR027923 (CDD); IPR036312 (SUPERFAMILY)	no GO terms	no GO terms
146	Leaf_L	AX-95196340	7B	24.53	720.37	---NA---	---	---	NF	---	---	---	---	---	no IPS match	no IPS match	no IPS match
Chr: Chromosome;
FPKM: Fragments Per Kilobase of transcript per Million mapped reads;
NF: Not found.
NHF: No Hits Found
